# Supplementary material
Source: MDPI journal article supplement (https://www.mdpi.com/1424-2818/16/5/280)
Supplement: s1 [file s1]

# Supplementary Materials

## Tracing Geographic and Molecular Footprints of Copepod Crustaceans Causing Multifocal Purple Spots Syndrome in the Caribbean Sea Fan *Gorgonia ventalina*

Oksana A. Korzhavina <sup>1</sup>, Mikhail A. Nikitin <sup>2</sup>, Bert W Hoeksema <sup>3,4</sup>, Maickel Armenteros <sup>5,6</sup>, James D. Reimer <sup>7,8</sup> and Viatcheslav N. Ivanenko <sup>1,9,\*</sup>

<sup>1</sup> Department of Invertebrate Zoology, Faculty of Biology, Lomonosov Moscow State University,

Moscow 119992, Russia; korzhavina@mail.bio.msu.ru

<sup>2</sup> Belozersky Institute of Physico-chemical Biology, Lomonosov Moscow State University, Moscow 119992, Russia; nikitin.fbb@gmail.com

<sup>3</sup> Marine Evolution and Ecology Group, Naturalis Biodiversity Center, 2300 RA Leiden, The Netherlands; bert.hoeksema@naturalis.nl

<sup>4</sup> Groningen Institute for Evolutionary Life Sciences, University of Groningen, 9700 CC Groningen, The Netherlands

<sup>5</sup> Center for Marine Research, University of Havana, Havana 11300, Cuba; maickel.armenteros@gmail.com

<sup>6</sup> Unidad Académica Mazatlán, Instituto de Ciencias del Mar y Limnología, Universidad Nacional Autónoma de México, Mazatlán 82040, Mexico

<sup>7</sup> Molecular Invertebrate Systematics and Ecology Laboratory, Faculty of Science, University of the Ryukyus, 1 Senbaru, Nishihara 903-0213, Okinawa, Japan; zoantharia1973@gmail.com

<sup>8</sup> Tropical Biosphere Research Center, University of the Ryukyus, 1 Senbaru, Nishihara 903-0213, Okinawa, Japan

<sup>9</sup> Faculty of Biology, Shenzhen MSU-BIT University, Shenzhen 518115, China

\* Correspondence: ivanenko.slava@gmail.com

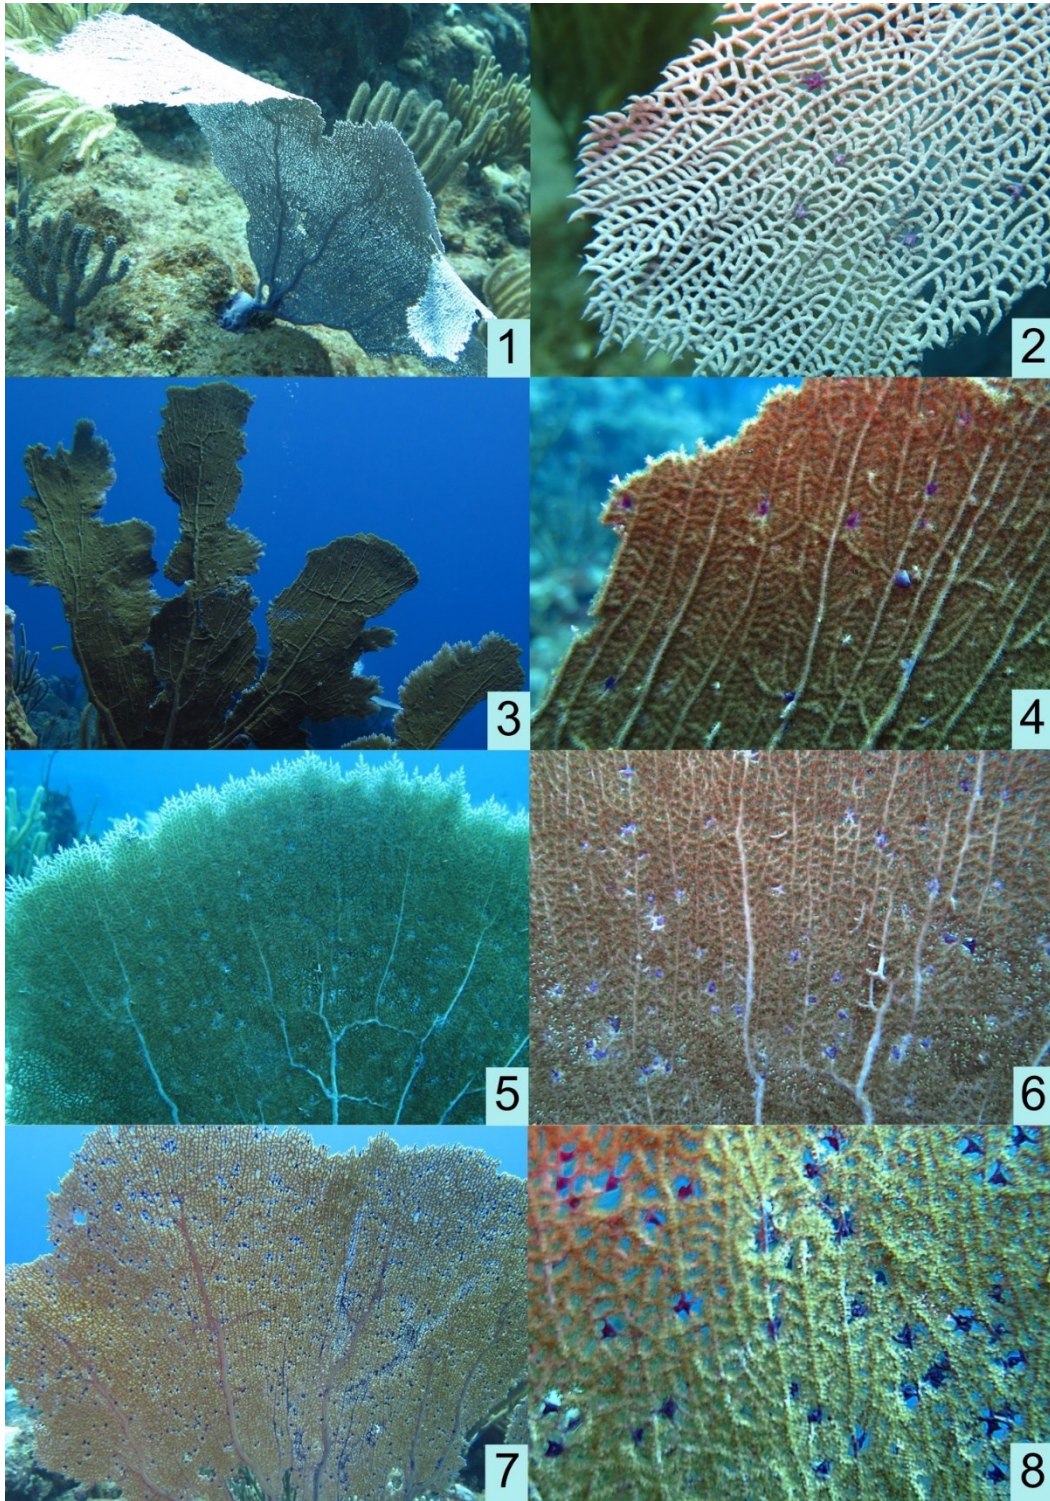

**Figure S1.** Specimens of *Gorgonia ventalina* (Linnaeus 1758) labeled as follows: Statia15-99 – 1, 2; Statia15-134 – 3, 4; Statia15-135 – 5, 6; Statia15-141 – 7, 8.



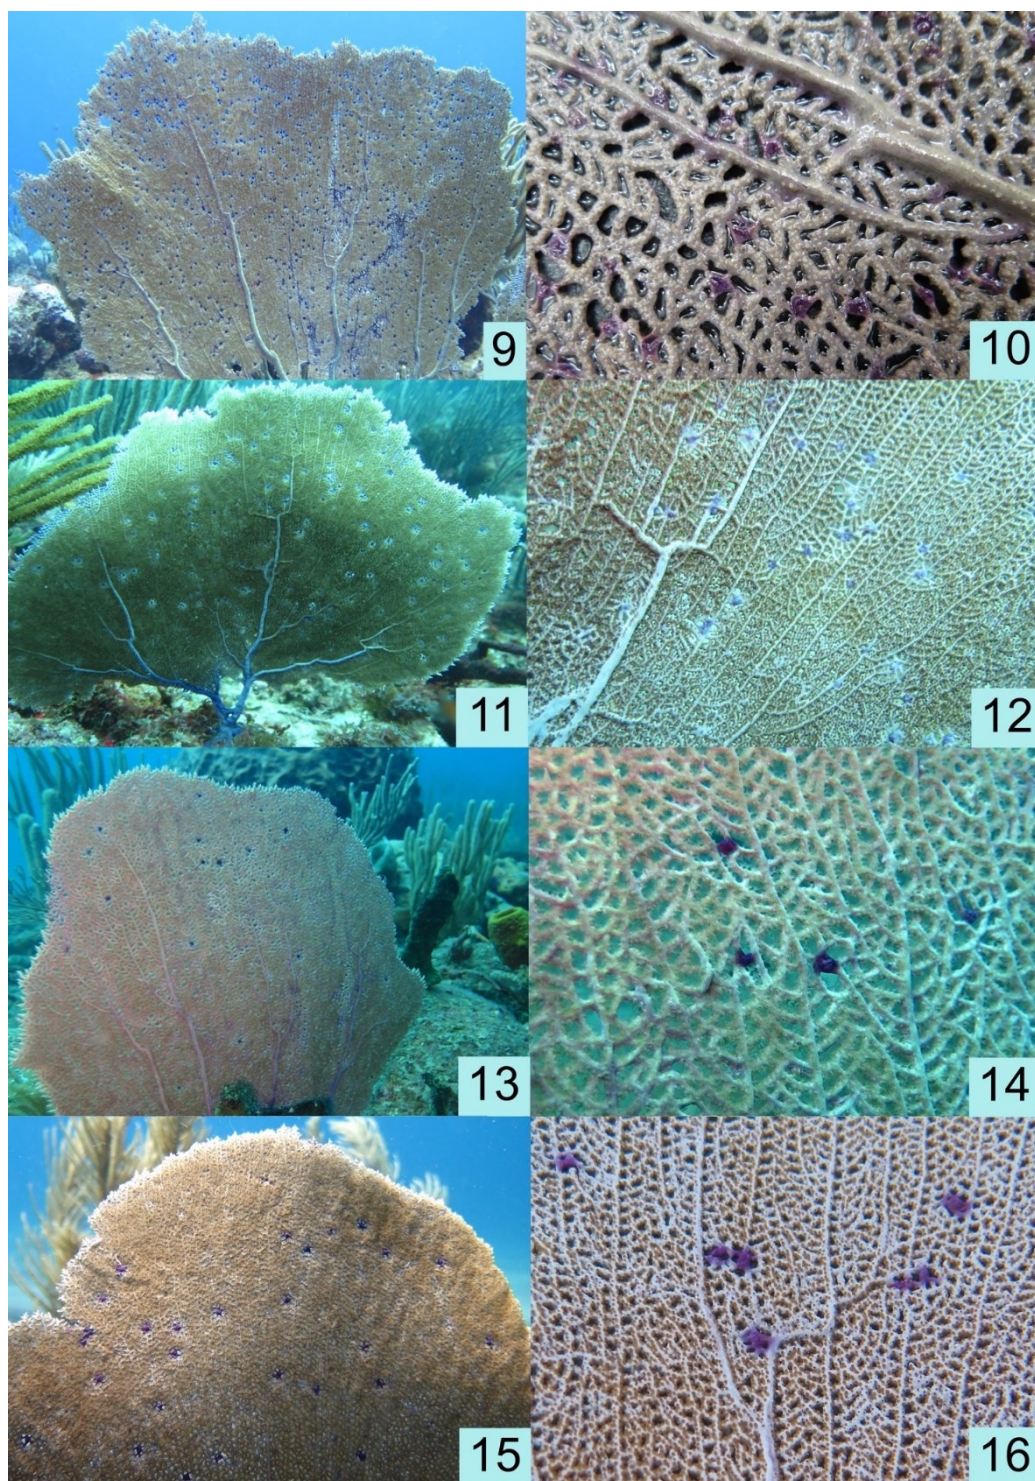

**Figure S2.** Specimens of *Gorgonia ventalina* (Linnaeus 1758) labeled as follows: Statia15-142 – 9, 10; Statia15-146 – 11, 12; Statia15-163 – 13, 14; Statia15-170 – 15, 16.



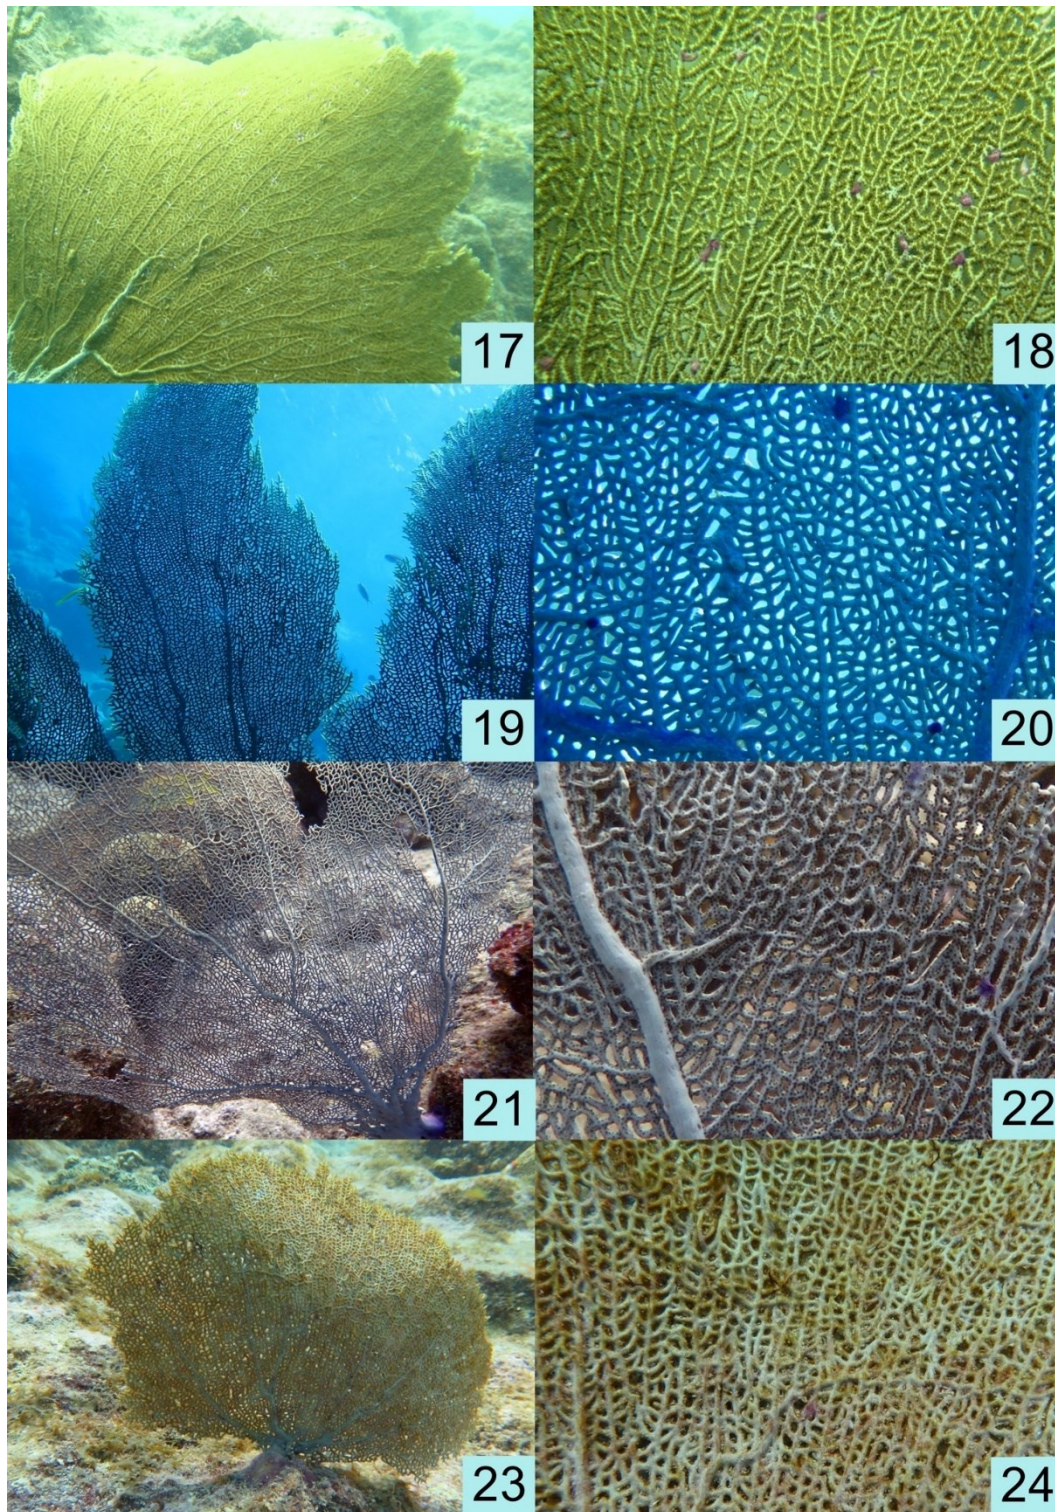

**Figure S3.** Specimens of *Gorgonia ventalina* (Linnaeus 1758) labeled as follows: Statia15-174 – 17, 18; CUR17-39 – 19, 20; CUR17-81 – 21, 22; CUR17-88 – 23, 24.



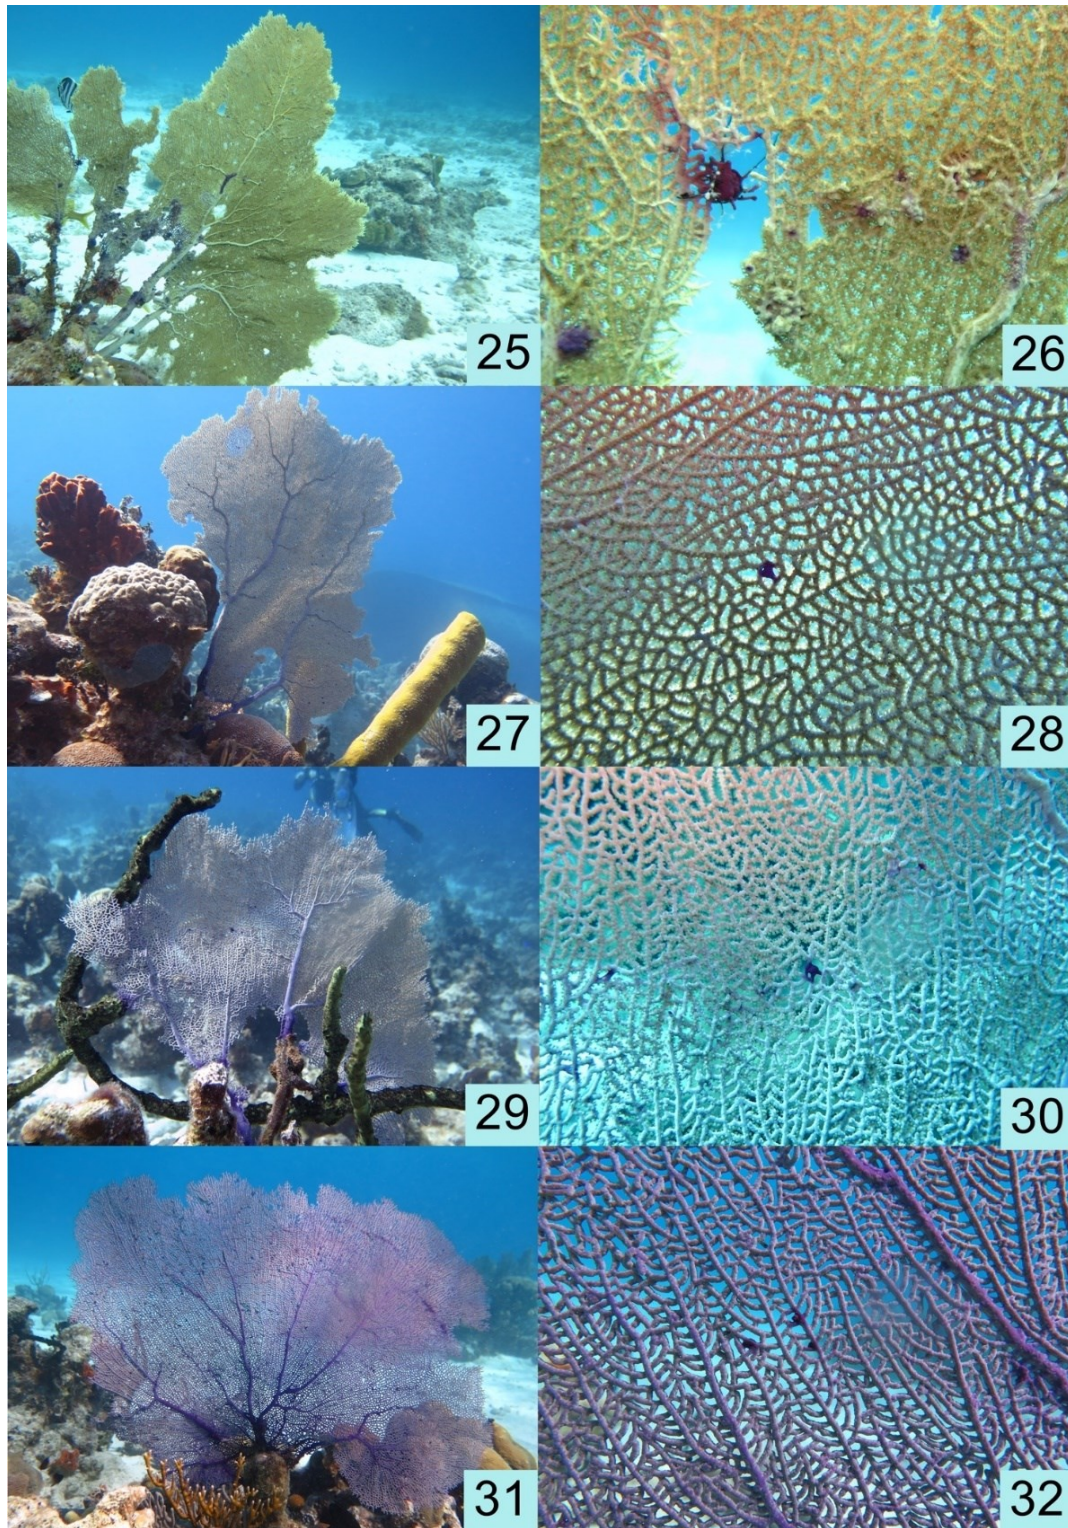

**Figure S4.** Specimens of *Gorgonia ventalina* (Linnaeus 1758) labeled as follows: CUR17-96 – 25, 26; Cuba19-1 – 27, 28; Cuba19-2 – 29, 30; Cuba19-3 – 31, 32.



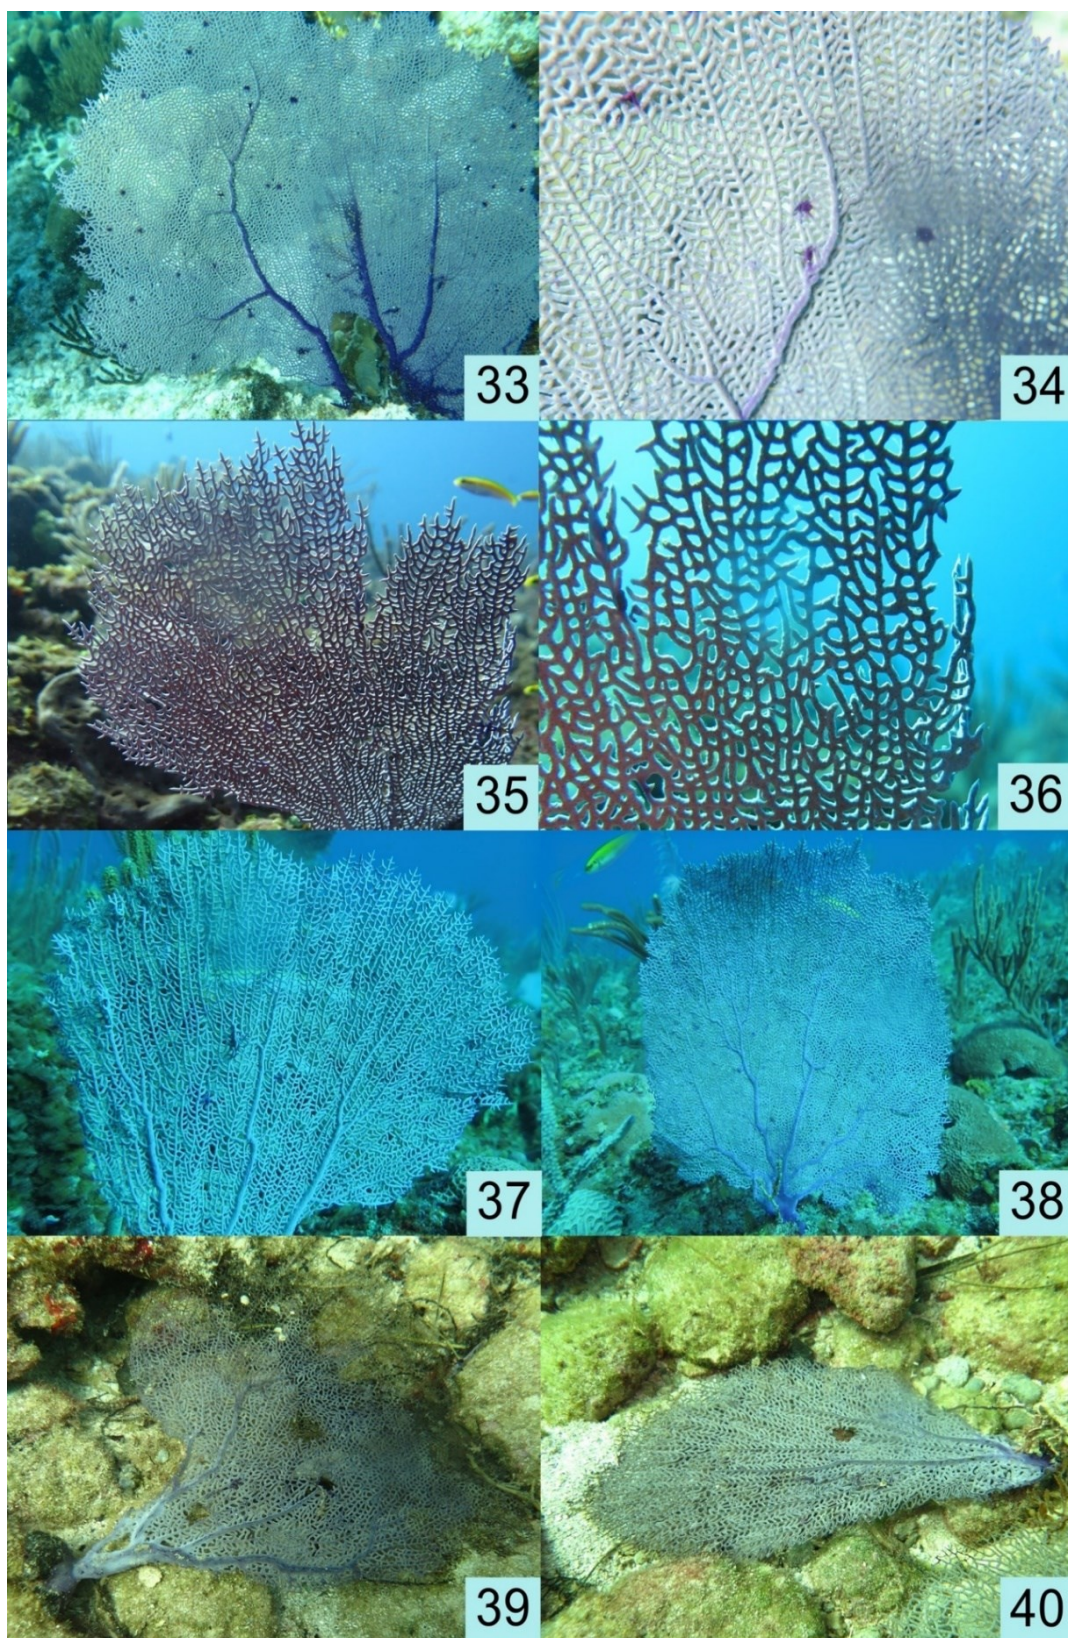

**Figure S5.** Specimens of *Gorgonia ventalina* (Linnaeus 1758) labeled as follows: Cuba19-5 – 33, 34; Cuba19-21 – 35, 36; Cuba19-22 – 37; Cuba19-25 – 38, no; Cuba19-32 – 39, no; Cuba19-33 – 40.



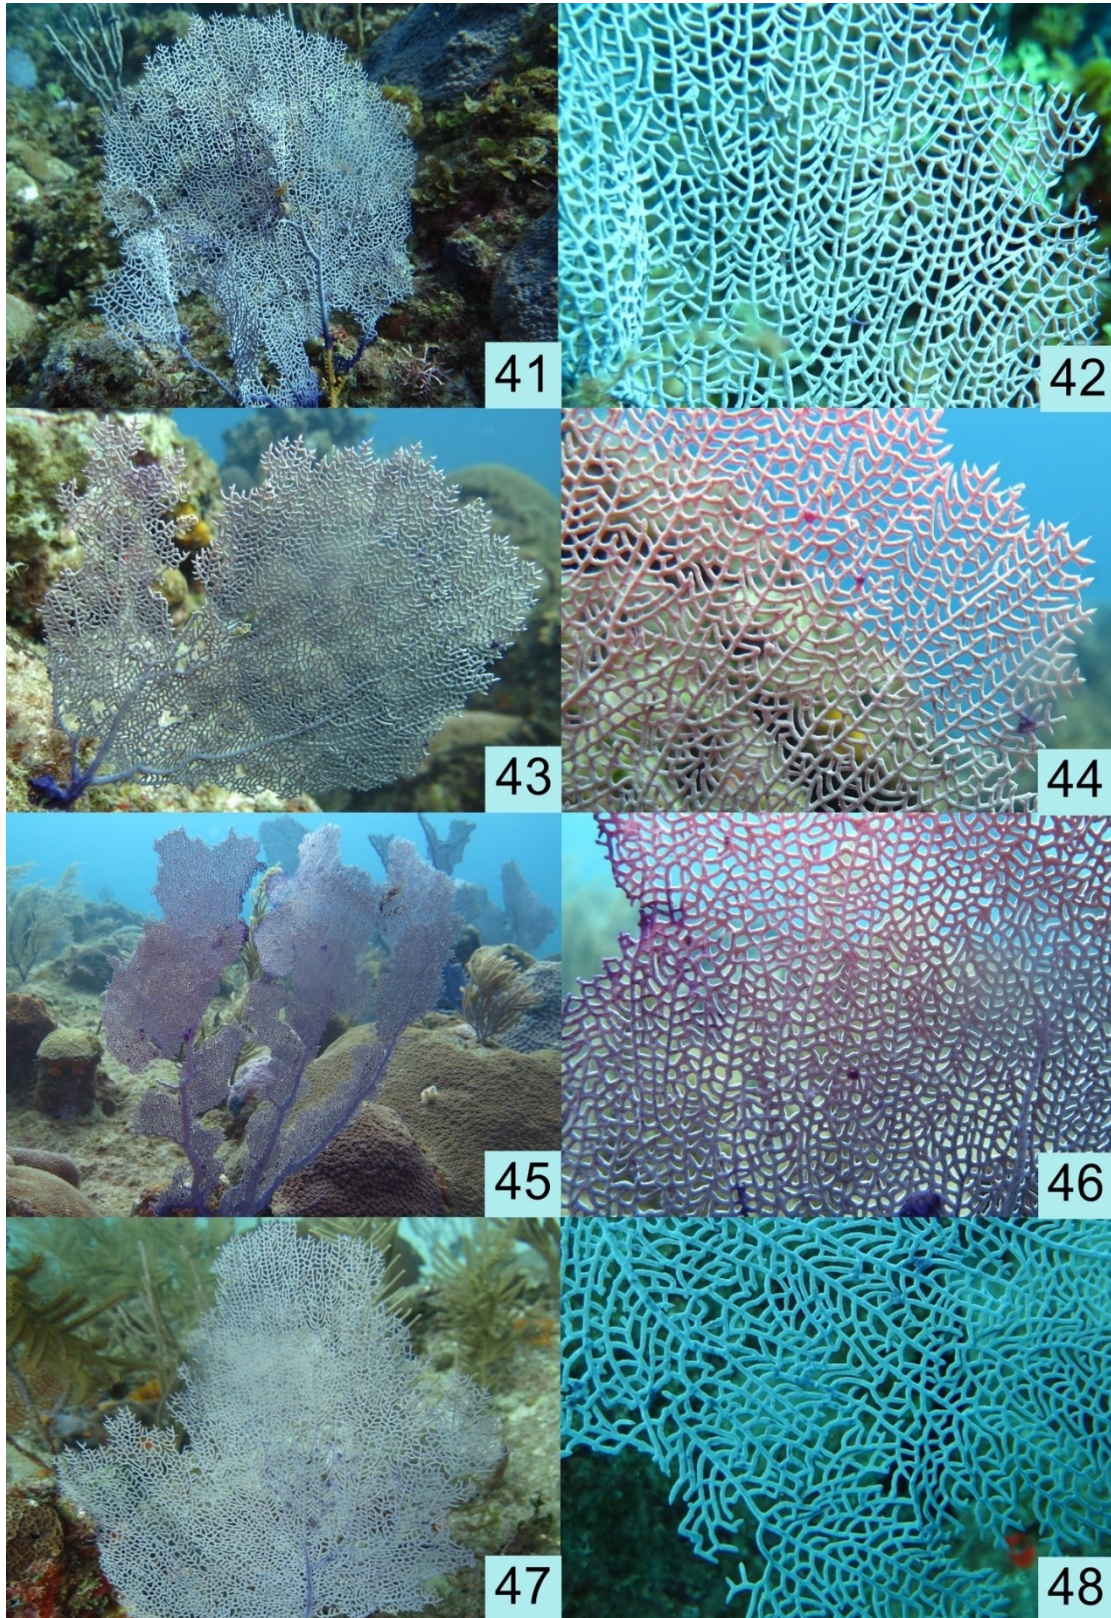

**Figure S6.** Specimens of *Gorgonia ventalina* (Linnaeus 1758) labeled as follows: Cuba19-23 – 41, 42; Cuba19-27 – 43, 44; Cuba19-28 – 45, 46; Cuba19-30 – 47, 48.



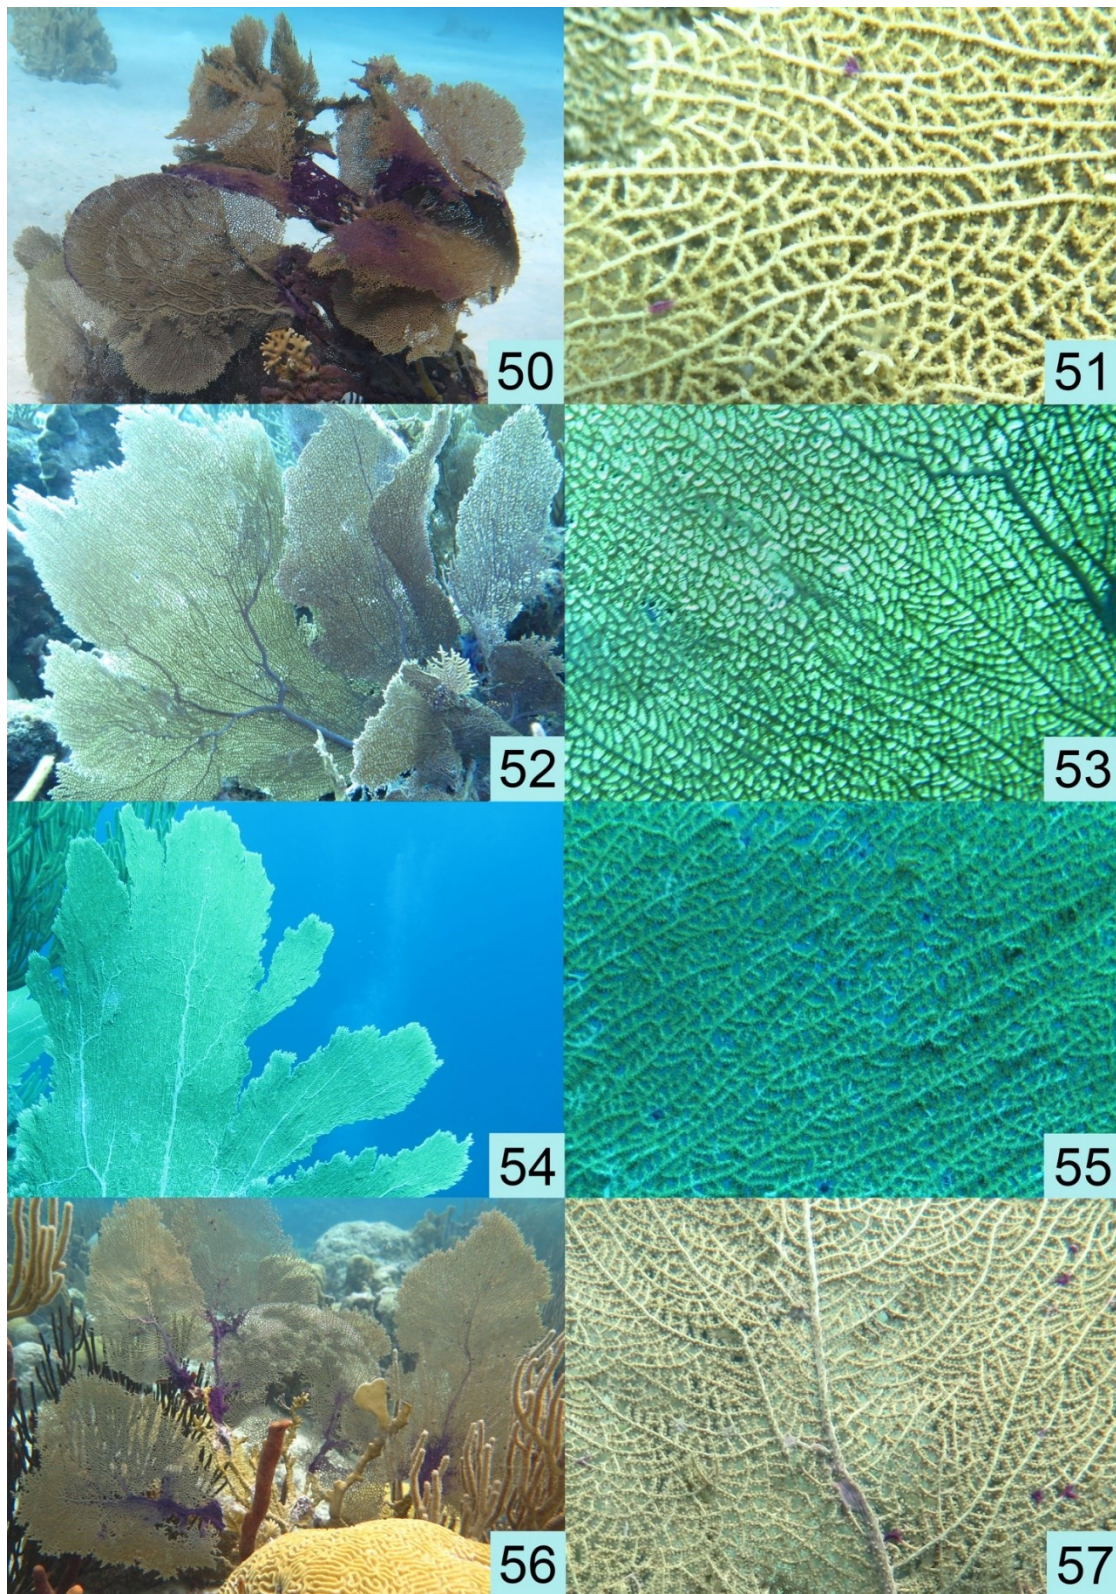

**Figure S7.** Specimens of *Gorgonia ventalina* (Linnaeus 1758) labeled as follows: Bonaire19-28 – 50, 51; Bonaire19-31 – 52, 53; Bonaire19-47 – 54, 55; Bonaire19-91 – 56, 57.



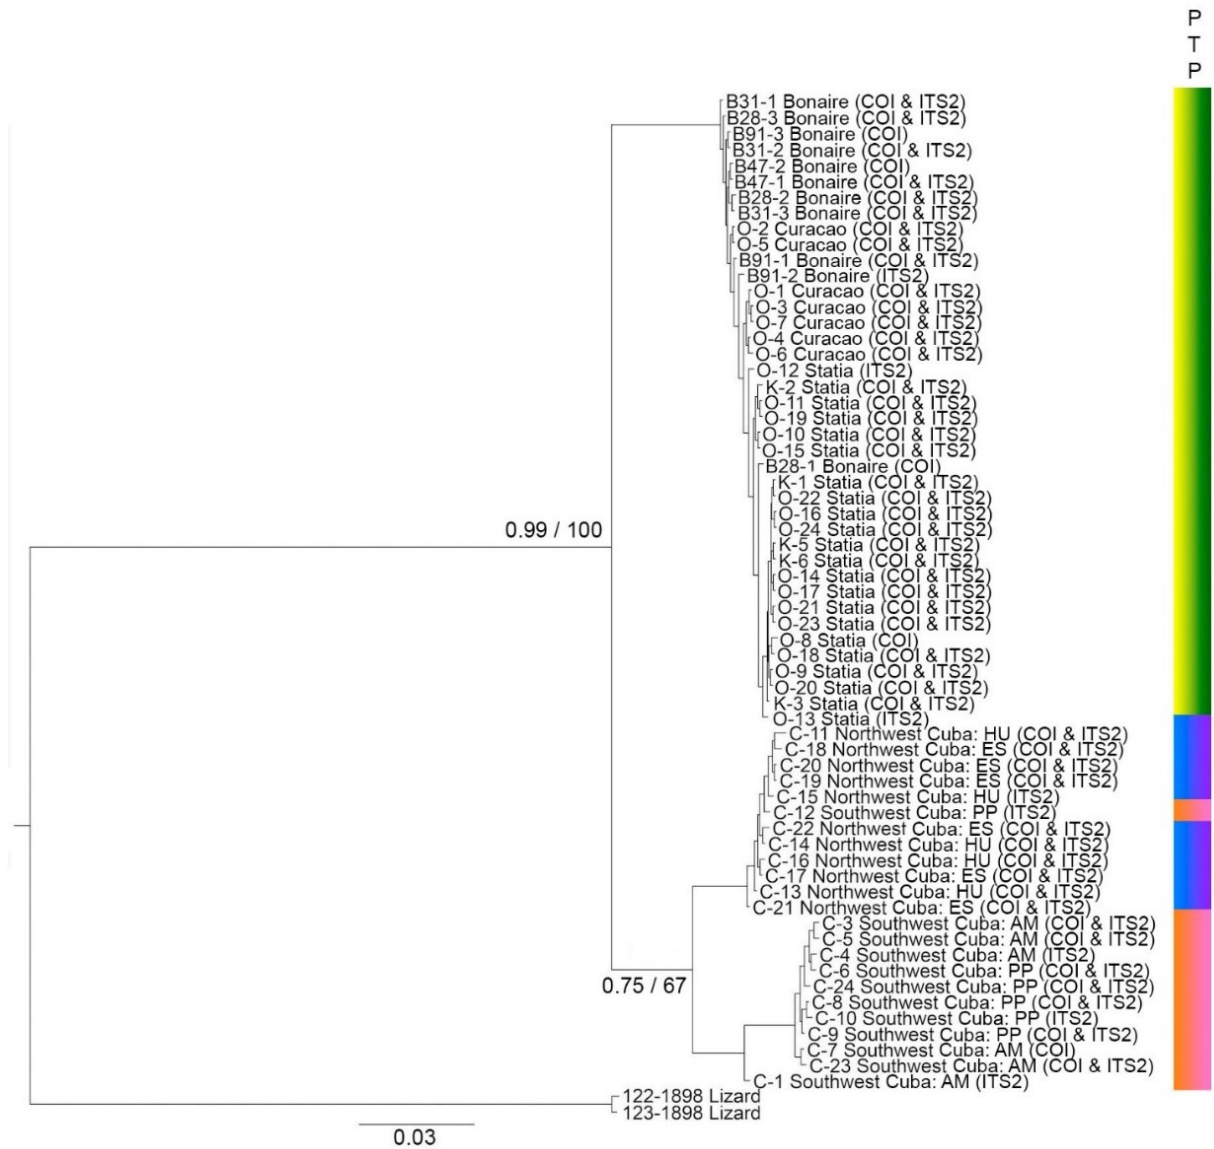

**Figure S8.** The phylogenetic tree was constructed based on the concatenated alignment of COI (Cytochrome c oxidase subunit I) and ITS2 (Internal Transcribed Spacer 2) sequences of Lamippidae copepods, including *Sphaerippe* spp. Model of nucleotide evolution is HKY+G for COI\_pos1, K81UF+I for ITS and COI\_pos2, HKY+I for COI\_pos3. Numbers in the nodes is posterior probabilities / bootstrap supports. Color bars on the right denote the species delimitation results. For additional details, including geographic coordinates, please refer to Table 1 and Table A4.



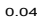



**Figure S9.** In the Bayesian (BA) phylogenetic tree based on the alignment of 18S sequences of crustacean copepods, as indicated in Table A6, the nucleotide evolution model applied was GTR + G + I. The numbers associated with the nodes represent Bayesian (BA) posterior probabilities. For additional information, refer to Figure 6 and Supplementary Figure 10 (Figure 6 and Figure S10).



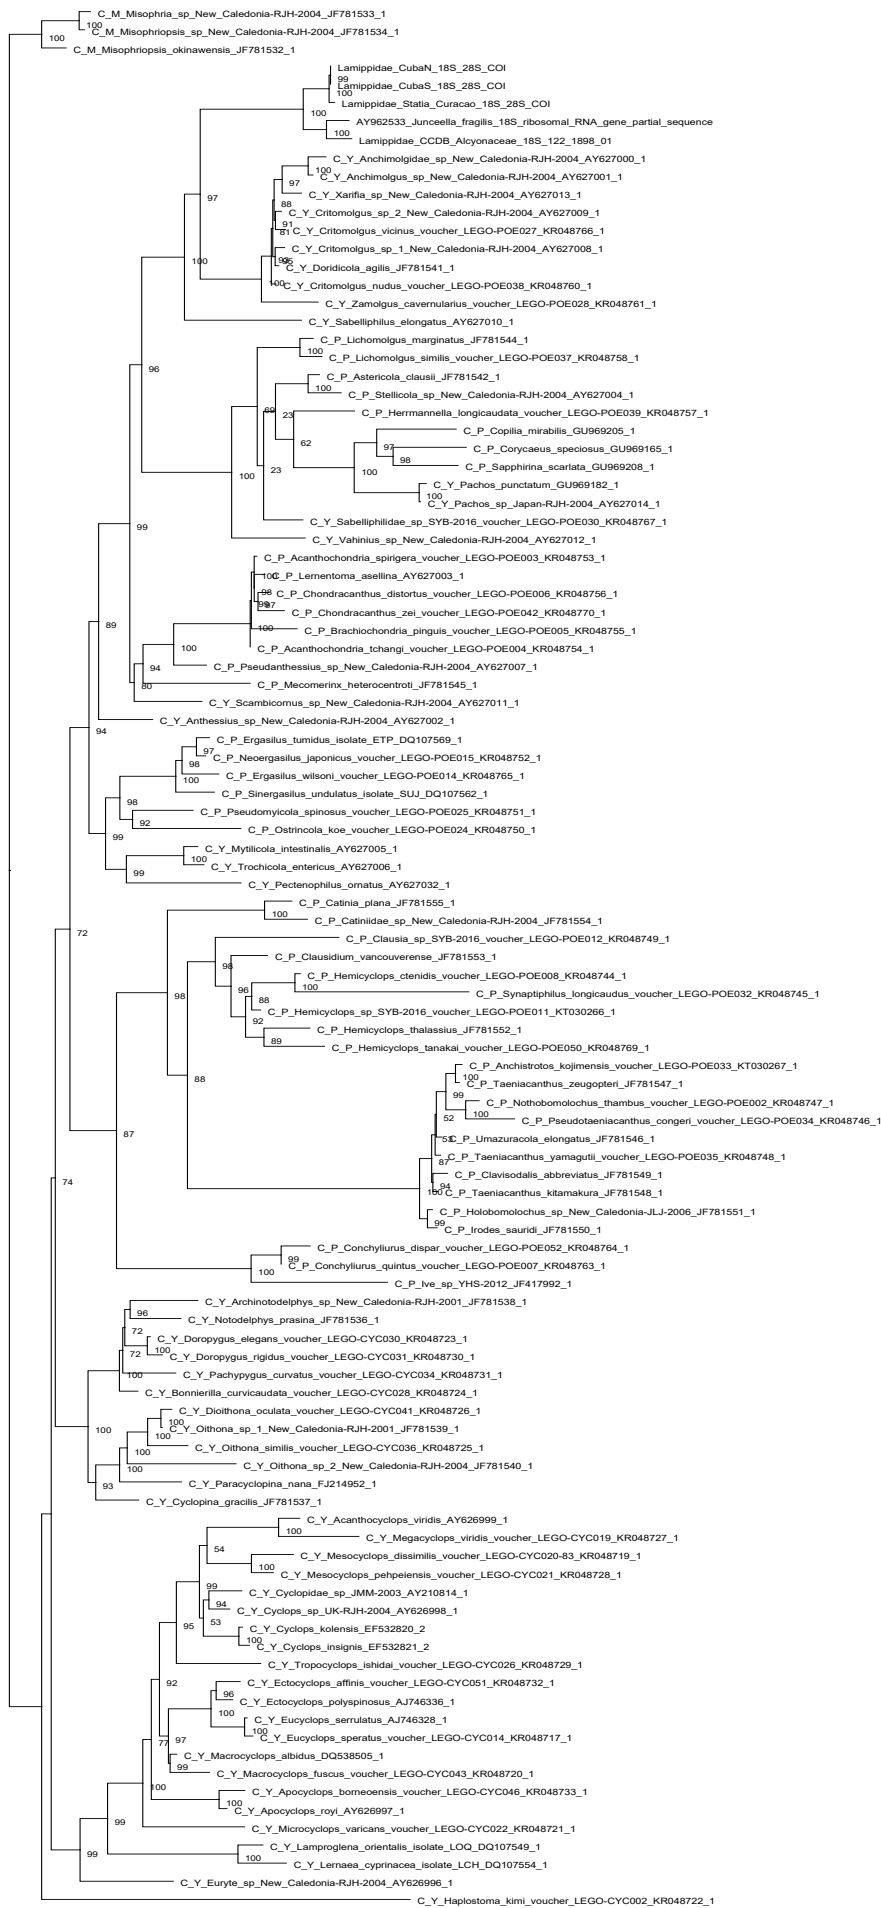

0.06



**Figure S10.** Maximum Likelihood phylogenetic tree based on the 18S alignment of copepod crustaceans indicated in Table S6. The nucleotide evolution model applied is GTR + G + I. The numbers associated with the nodes represent bootstrap support values. For additional information, refer to Figure 6 and Supplementary Figure 9 (Figure 6 and Figure S9).
